# Supplementary material
Source: Springer Nature journal article supplement (https://www.springermedizin.de/resource/supplementary/12872_2005_102_MOESM3_ESM.pdf/9431022)

**(a)**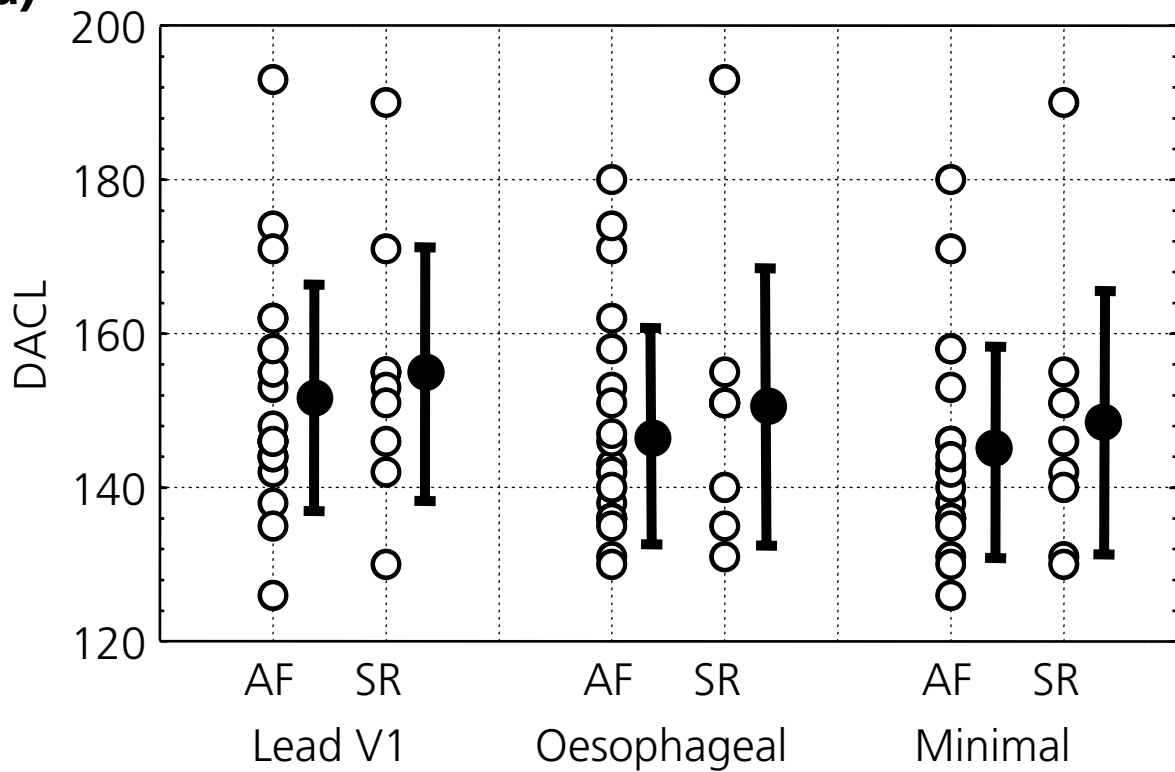**(b)**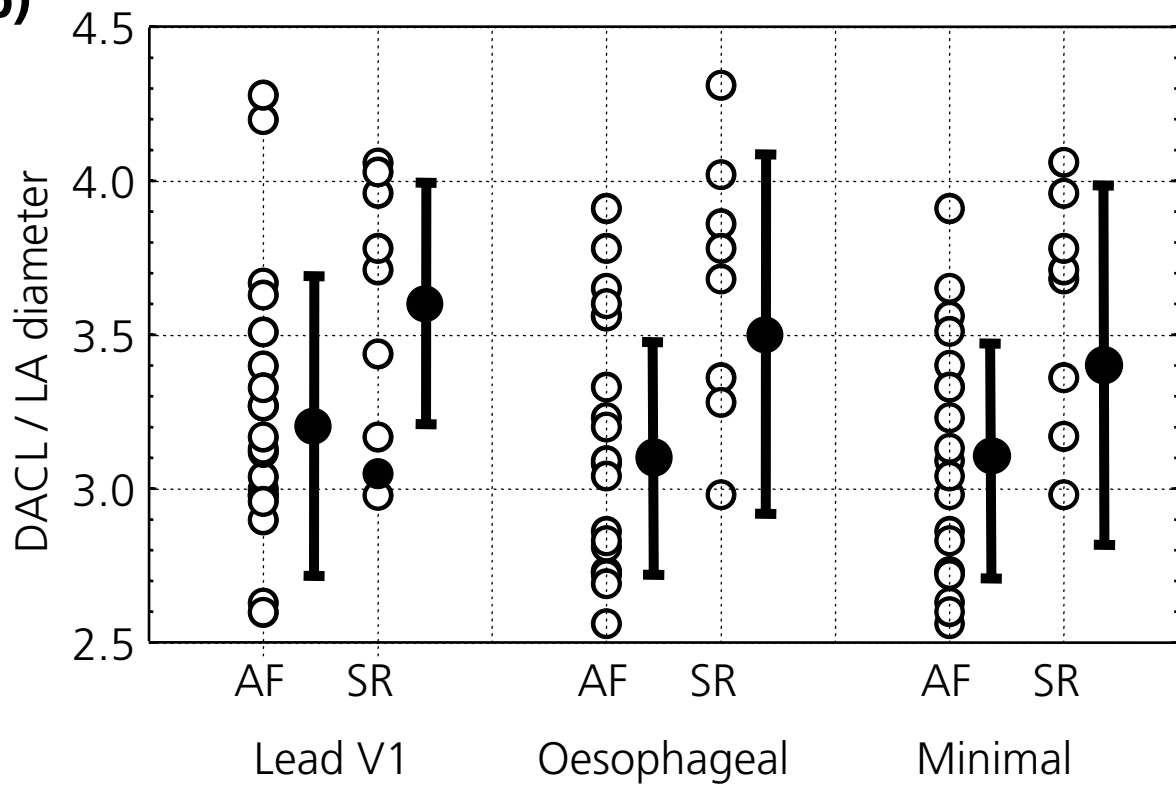

Supplement: MOESM3 [file 9431022]
